## Review Article

# Kinetochores–microtubule error correction for biorientation: lessons from yeast

 Shuyu Li,  Taciana Kasiciukovic and  Tomoyuki U. Tanaka

Division of Molecular, Cell and Developmental Biology, School of Life Sciences, University of Dundee, Dow Street, Dundee DD1 5EH, U.K.

**Correspondence:** Tomoyuki U. Tanaka ([t.tanaka@dundee.ac.uk](mailto:t.tanaka@dundee.ac.uk)) or Shuyu Li ([s.q.li@dundee.ac.uk](mailto:s.q.li@dundee.ac.uk))

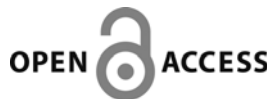

Accurate chromosome segregation in mitosis relies on sister kinetochores forming stable attachments to microtubules (MTs) extending from opposite spindle poles and establishing biorientation. To achieve this, erroneous kinetochore–MT interactions must be resolved through a process called error correction, which dissolves improper kinetochore–MT attachment and allows new interactions until biorientation is achieved. The Aurora B kinase plays key roles in driving error correction by phosphorylating Dam1 and Ndc80 complexes, while Mps1 kinase, Stu2 MT polymerase and phosphatases also regulate this process. Once biorientation is formed, tension is applied to kinetochore–MT interaction, stabilizing it. In this review article, we discuss the mechanisms of kinetochore–MT interaction, error correction and biorientation. We focus mainly on recent insights from budding yeast, where the attachment of a single MT to a single kinetochore during biorientation simplifies the analysis of error correction mechanisms.

## Introduction

Chromosomes contain vital genetic information. So, to maintain genetic integrity, proper chromosome segregation is required during mitosis in eukaryotic cells, i.e. duplicated chromosomes (sister chromatids) should separate accurately and be distributed equally between two daughter cells. Correct and stable interaction between the kinetochore and microtubules (MTs) is essential for high-fidelity chromosome segregation. The yeast kinetochore is a large protein complex, comprising over 50 components, and organized into distinct subcomplexes such as COMA, MIND and the Ndc80 complex (Ndc80C) [1,2], all of which assemble at the point centromere region in the budding yeast [3]. Despite vast differences in centromeric DNA across species, the fundamental architecture of the kinetochore is conserved from yeast to humans [4]. Budding yeast serves as an excellent model system for studying kinetochore–MT interaction not only because of the versatile molecular genetics in this organism but also because of each kinetochore binding to a single MT [5], simplifying the analysis of this process.

In yeast, MTs extend from spindle poles that are organized by spindle pole bodies (SPBs). MTs have dynamic, hollow, tube-like structures, and they undergo phases of growth and shrinkage through the addition and removal of tubulin heterodimers at their plus ends. Kinetochore–MT interaction occurs in a stepwise manner: Initially, the kinetochore attaches to the lateral side of an MT extending from a spindle pole (lateral attachment), which is a conserved step from yeast to vertebrates [6,7]. The MT lateral side provides a large surface for kinetochore interaction, and the lateral attachment is often assisted by a transiently formed kinetochore-derived short MT that interacts with an MT extending from a spindle pole (Figure 1, Step 1) [8–11]. Subsequently, kinetochores move along the MT towards the spindle pole, which is driven by Kar3 (kinesin 14) motor in budding yeast and the dynein motor in animal cells (Step 2) [7,12,13]. The lateral attachment transitions to the end-on attachment where the kinetochore attaches to the MT plus end as the MT depolymerizes and its plus end interacts with the kinetochore (Step 3) [14,15]. If sister kinetochores aberrantly attach to MTs from the same pole (syntelic attachment, Step 4B), at least one of the kinetochore–MT interactions should be removed to

Received: 23 November 2023

Revised: 11 January 2024

Accepted: 15 January 2024

Version of Record published:

2 February 2024

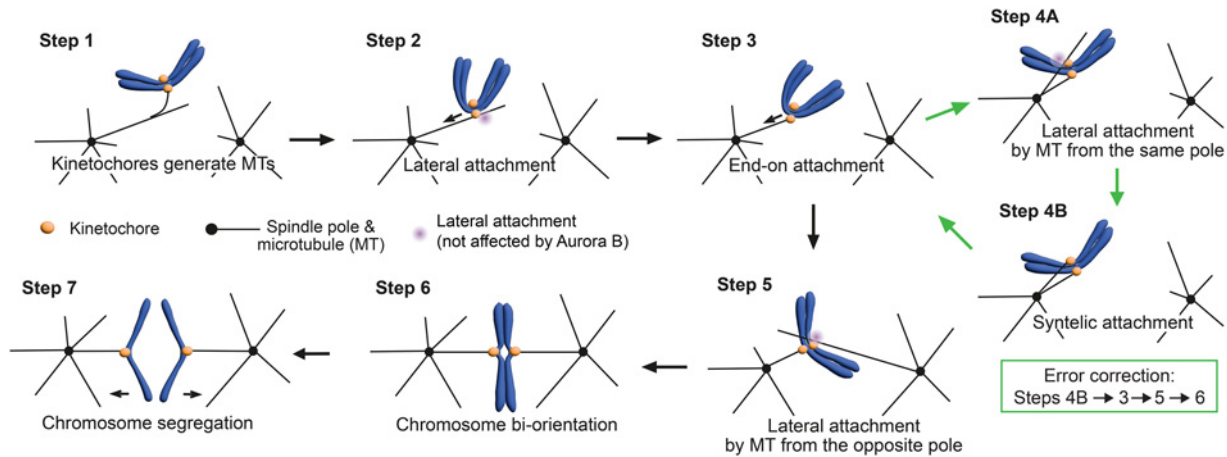

**Figure 1. The diagram shows kinetochore–MT interaction during mitosis.**

Each step of the process is detailed in the text. The transition from Steps 4B, 3, 5 to 6 represents the error correction. Note that Steps 1, 2 and 3 occur before the separation of the spindle poles (establishment of the bipolar spindle) in budding yeast [23], but these steps (and other steps) occur after it in vertebrate cells (as shown here).

allow a fresh interaction (Figure 1, error correction) [16,17]. Once sister kinetochores attach to MTs extending from opposite poles (biorientation establishment), tension is applied across sister kinetochores, stabilizing kinetochore–MT interactions (Steps 5, 6) [18].

Chromosome biorientation is fundamental for correct chromosome segregation in anaphase, and error correction is crucial for the establishment of biorientation. Although several mechanisms for the regulation of error correction have been identified or suggested, the precise dynamics for the exchange (or turnover) of kinetochore–MT interactions during error correction remain elusive. It is also not clear how tension stops this exchange and stabilizes kinetochore–MT interaction. In this review article, we discuss how the study of budding yeast, *Saccharomyces cerevisiae*, as a model organism has helped our understanding of error correction mechanisms. We highlight research advancements made over the last 5 years. It is worth noting that many regulators, discussed here, are also involved in the spindle-assembly checkpoint (SAC). However, in this review, we do not discuss the SAC that was covered in other recent reviews [19,20].

## Kinetochore–microtubule interface in budding yeast: the Ndc80 and Dam1 complexes and their regulation

The kinetochore–MT interface in budding yeast is organized through the concerted action of the outer kinetochore complexes and MT-associated proteins and motors. The Ndc80C and the Dam1 complex (Dam1C, also called DASH) are major outer kinetochore components in budding yeast, which directly interact with MTs and play major roles in forming kinetochore–MT interface [1,21,22]. The Ndc80C, consisting of four proteins (Ndc80, Nuf2, Spc24, and Spc25), is a conserved outer kinetochore protein complex that plays a crucial role in both the lateral and end-on attachment of kinetochores to spindle MTs [7]. The Dam1C, which consists of 10 proteins including Dam1, Duo1, Ask1, Spc34 and Spc19, is not part of the kinetochore and localizes at the MT plus end during the lateral attachment, but subsequently interacts with Ndc80C to provide a kinetochore–MT interface for the end-on attachment [15,17,23]. The Dam1Cs oligomerizes into a partial or complete ring encircling an MT *in vitro* [24,25], and couples the kinetochore motion to the MT plus end [26–28]. To resolve aberrant kinetochore–MT interactions, Aurora B kinase (Ipl1 in budding yeast) phosphorylates the Dam1C components and Ndc80 protein to weaken and disrupt the end-on attachment [29–31]. The phosphorylation of Dam1C is fundamental in this process, while the phosphorylation of the Ndc80 N-terminus modestly contributes to it by weakening Ndc80C–MT interaction. New functional and structural information on Ndc80C and Dam1C have been obtained in recent years, thanks to advancements in biochemical reconstitution, cryo-electron microscopy (cryo-EM) technique, AI-based structure prediction (AlphaFold2) and super-resolution microscopy.

Although the Dam1Cs form a partial or complete ring around an MT *in vitro* [24,25], it had been unclear whether this is also the case *in vivo* (i.e. within cells). Using electron tomography reconstitution of *in situ* serial cryosections in budding yeast cells, it was recently shown that Dam1Cs oligomerize into a partial or complete ring around an MT in the vicinity of the MT plus ends *in vivo* during metaphase [32]. Moreover, within the ring, each Dam1C forms a ‘bridge’ that directly interacts with the MT wall both *in vitro* and *in vivo* [32]. Another study showed that MT-associated protein Bim1 stably binds a Dam1C component Duo1 and promotes the assembly of the Dam1C ring around an MT [33]. In addition, phosphorylation of a Dam1C subunit, Ask1, by Cdk1 kinase was also suggested to enhance the Dam1C ring assembly (or Dam1C affinity to an MT) and strengthen the kinetochore–MT interaction [34]. Moreover, the intermediate filament protein Fin1 localizes at the kinetochore and adjusts the stoichiometry of Ndc80C and Dam1C in anaphase [35]. Furthermore, using nanoscale super-resolution microscopy (single-molecule localization microscopy), individual kinetochores were distinctly visualized *in vivo* in the yeast mitosis [36]. This demonstrated not only the precise location and distribution of individual kinetochores in the nucleus but also the relative positions and copy numbers of kinetochore components (including Ndc80C and Dam1C) within each kinetochore [36].

For the establishment of biorientation, phosphorylation of the following Dam1C components by Aurora B is crucial for error correction: Dam1 (S20, S257, S265 and S292), Ask1 (S200) and Spc34 (T199), where their residues for phosphorylation are shown in parentheses [30]. Recent studies addressed how these phosphorylated residues disrupt end-on attachment to promote error correction. Evidence suggested that the phosphorylation of Dam1 S20 is important to reduce oligomerization (or ring formation) and MT binding of Dam1Cs [27,37], while the clustered phosphorylation at Dam1 C-terminus (S257, S265 and S292) is crucial to weaken the Dam1 interaction with the hairpin region of Ndc80 [17,38–41]. Moreover, using protein cross-linking and mass spectrometry it was shown that Dam1 C-terminus, Ask1 middle region (including S200) and Spc34 C-terminus (including T199) interact with three different regions of Ndc80C [42]. It was also suggested that phosphorylation of Ask1 S200 and Spc34 T199 contributes to weakening the Dam1C–Ndc80C interaction [42].

Meanwhile, the detailed structure of the core Dam1C ring was revealed using cryo-EM [43]. Although the structure did not include the Dam1 C-terminus and Ask1 middle region as they are flexible, a structural model was proposed for how these regions and Spc34 C-terminus interact with the three different regions of Ndc80C [43] (Figure 2). Subsequently, it was shown that the three interactions between Dam1C and Ndc80C were weakened by phosphorylation of Dam1, Ask1 and Spc34 by Aurora B (with the effect being greater in this order) [44]. Most recently, cryo-EM and AlphaFold2 studies demonstrated how phosphorylation of Dam1, Ask1 and

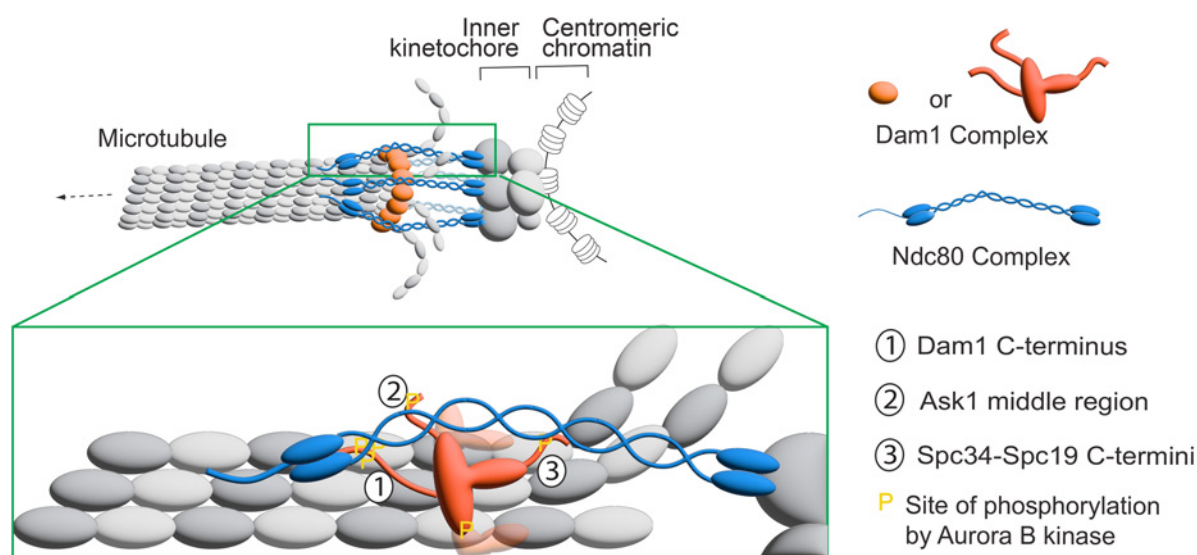

**Figure 2. The interaction between the Dam1 and Ndc80 complexes at the kinetochore–MT interface.**

The diagram shows the interaction between Dam1C and Ndc80C during the end-on attachment in budding yeast based on [42,43]. The Dam1 C-terminus, Ask1 middle region and Spc34/Spc19 C-termini interact with different regions of the Ndc80C. Sites of phosphorylation on Dam1C by Aurora B kinase [30] are shown by ‘P’ in yellow.

Spc34 by Aurora B can weaken the end-on attachment. The Dam1 N-terminus localizes at the interface between individual Dam1Cs in their oligomerized form. S20 of Dam1 is buried at this interface, and it was suggested that S20 phosphorylation would disrupt this interface, thus explaining how this phosphorylation inhibits Dam1C oligomerization and ring formation [45]. Moreover, two short segments of Dam1 residues 251–272 and 287–301 interact with the Ndc80–Nuf2 coiled-coil next to their calponin-homology (CH) domains, and it was suggested that phosphorylation of S257, S265 and S292 would disrupt these interactions [45,46]. The structure also demonstrated how the Spc34 C-terminus (including T199) interacts with the central segment of the Ndc80–Nuf2 coiled-coil [45]. Moreover, the identified Dam1C–Dam1C and Dam1C–Ndc80C interaction sites were indeed important for cell viability and for withstanding forces in an optical tweezer assay [45]. Thus, recent works demonstrated the structural details regarding (1) how the Dam1Cs oligomerize and form a ring encircling an MT and (2) how Dam1Cs interact with Ndc80Cs. These works also suggest how phosphorylation of Dam1, Ask1 and Spc34 by Aurora B disrupts the Dam1C ring formation and Ndc80C–Dam1C interactions through steric hindrance and charge repulsion to promote error correction.

## Kinetochores–microtubule interactions exchange during error correction

As discussed in section “Kinetochores–microtubule interface in budding yeast: the Ndc80 and Dam1 complexes and their regulation”, aberrant kinetochores–MT interaction is disrupted through phosphorylation of Dam1C and Ndc80C by Aurora B kinase. This process is sensitive to tension applied to kinetochores–MT interaction, i. e. under low tension Dam1C phosphorylation occurs, promoting error correction [47,48]. In contrast, when biorientation is established and high tension is applied, Dam1C is dephosphorylated and kinetochores–MT interaction is stabilized [47,48]. To establish biorientation, a new kinetochores–MT interaction must be formed after the aberrant one is removed. This may constitute a conundrum since the new interaction should be discouraged by Aurora B while tension is low. However, it was shown the kinetochores interaction with the MT lateral side (lateral attachment) is impervious to the action of Aurora B, while the kinetochores interaction with the MT end (end-on attachment) is disrupted by Aurora B under low tension [17]. It was, therefore, suggested that, after aberrant end-on attachment (in which both sister kinetochores interact with MTs from the same spindle pole) is resolved (Figure 1, Steps 4B–3), a new lateral attachment is formed. If this results in an aberrant attachment (Figure 1, Step 4A), its resolution is promoted by Aurora B again. However, if biorientation is established, tension is applied and kinetochores–MT interaction is stabilized (Figure 1, Steps 5, 6) [17]. The differential regulation of lateral and end-on attachments by Aurora B may occur since (1) Dam1C is the main Aurora B substrate for error correction and (2) Dam1C is involved in the end-on, but not lateral, kinetochores attachment (see section “Kinetochores–microtubule interface in budding yeast: the Ndc80 and Dam1 complexes and their regulation”). Since phosphorylation of Dam1C components by Aurora B regulates Dam1C–Dam1C and Dam1C–Ndc80C interactions (see section “Kinetochores–microtubule interface in budding yeast: the Ndc80 and Dam1 complexes and their regulation”), Dam1C, Ndc80C and Aurora B may be sufficient to recapitulate the differential regulation of lateral and end-on attachments. Indeed, this was the case in an *in vitro* reconstitution experiment using dynamic MTs and purified Ndc80C and Dam1C — the latter containing phosphomimetic mutants at its Aurora B phosphorylation sites [49].

In addition to Aurora B kinase, other factors also regulate kinetochores–MT interactions for error correction. The Mps1 kinase is required for error correction to achieve chromosome biorientation [50–52]. Evidence suggests that, like Aurora B kinase, Mps1 kinase weakens and disrupts aberrant kinetochores–MT interactions both *in vivo* and *in vitro* in budding yeast and human cells [50,53,54]. In yeast, Mps1 kinase is also required for the SPB duplication and SAC [55]. Through the analyses of novel *mps1* mutations and their suppressor mutations, it was suggested that the SPB duplication and biorientation are regulated by separate pathways involving Mps1 [56] while the SAC and biorientation are governed by the common Mps1 pathway [57]. For Mps1 recruitment to the kinetochores, the Mps1 N-terminus binds the backside (opposite from the MT-binding side) of Ndc80–Nuf2 CH domains and the evidence suggests that the SAC and biorientation indeed rely on this binding [58–61]. Phosphorylation of the Ndc80 N-terminus by Mps1 contributes to error correction [53], while phosphorylation of the Dam1 C-terminus by Mps1 changes kinetochores distribution in metaphase (indicative of altered kinetochores–MT interaction) [62]. However, the relevant non-phosphorylatable mutants of Ndc80 and Dam1 showed much milder defects in biorientation than an Mps1 kinase mutant [50,53,62]. Therefore, we predict that other crucial Mps1 substrates, whose phosphorylation is critical for biorientation, remain unidentified.

Another factor regulating error correction is Stu2, which is the yeast orthologue of vertebrate ch-TOG and XMAP215. Stu2 has the activity as the MT polymerase and MT nucleator [10,63,64]. However, independent of its regulation of MT dynamics, Stu2 has the activity to weaken and disrupt the kinetochore–MT interaction under low tension *in vitro* [65]. Stu2 mutants, which either fail to localize at the kinetochore or lose function specifically at the kinetochore, show biorientation defects and make cells inviable, suggesting that Stu2 at the kinetochore regulates error correction for biorientation [66,67]. It remains to be elucidated how Stu2 localized at the kinetochore promotes error correction, independently of its regulatory function on MT dynamics.

Although Aurora B and other regulators weaken the end-on attachment under low tension, this seems insufficient for efficient disruption of the end-on attachment. For example, while the kinetochore was transported by depolymerization of an end-on attached MT, the end-on attachment was rarely disrupted [15]. It was recently reported that the forces, which are generated by dynamic growth and shrinkage of kinetochore–attached MTs, facilitate disruption of the end-on attachment when the attachment is weakened under low tension (or with Dam1 phospho-mimetic mutants) [68]. In this study, the tension on the kinetochore–MT interaction was lowered by using mutants of a motor protein localizing on the interpolar MTs [68]. In physiological conditions, such forces facilitating the disruption of end-on attachment may be generated when two MTs involved in syntelic attachment (i.e. sister kinetochores that attach to the two MTs extending from the same spindle pole) concurrently show dynamic growth and shrinkage. Alternatively, even slightly different dynamics of two MTs in syntelic attachment would generate a twisting force on sister kinetochores. Such twisting force may facilitate the disruption of one of the two end-on attachments in syntelic attachment, thus resolving the aberrant attachment [69]. Once this happens, the twisting force would be relieved, and the other end-on attachment would not be lost. This would avoid a simultaneous loss of MT attachments at both sister kinetochores and prevent a chromosome from drifting away from the spindle during error correction.

## Tension stabilizes the kinetochore–microtubule interaction

Understanding the exact localization of Aurora B kinase at the centromere/kinetochore could give an important clue to its role in error correction. Aurora B localizes at the centromere/kinetochore in early mitosis and this localization continues until anaphase onset in both vertebrate cells [70] and budding yeast [71,72]. Aurora B (also known as Ipl1 in yeast) is the catalytic component of the chromosome passenger complex (CPC), which also includes INCENP, Survivin, and Borealin — or Sli15, Bir1, and Nbl1, as they are known in budding yeast [70]. The C-terminus of INCENP (Sli15) binds and activates Aurora B (Ipl1) [70,73]. The CPC is recruited to the centromere, mediated by the interaction of Survivin with Shugoshin and phosphorylated histones [74–78]. However, more recent studies showed a Survivin (Bir1)-independent CPC recruitment mechanism in budding yeast. In this mechanism, INCENP (Sli15) directly interacts with Mcm21–Ctf19 subcomplex at the inner kinetochore to facilitate the CPC recruitment [79,80]. These two mechanisms of CPC recruitment, Survivin-dependent and -independent, function redundantly in promoting chromosome biorientation, although the Survivin-dependent mechanism is more predominant. If both mechanisms are impaired, most sister kinetochores fail to establish biorientation [79,81].

The CPC shows dynamic turnover on the centromere/kinetochore during early mitosis in human cells [82–85]. It was previously proposed that this turnover could be important for error correction as it may help Aurora B reach its distant substrates and/or facilitate Aurora B's activation on the mitotic spindle (and then to shuttle back to the centromere/kinetochore) [86,87]. Recently the dynamic turnover of CPC was also observed in budding yeast [88]. However, using an engineered recruitment of Aurora B–INCENP, it was suggested that this turnover is not required for error correction [88]. Another report indicated that the level of CPC at the kinetochore/centromere is reduced a while after the establishment of the bipolar spindle [89]. This may not regulate error correction in an unperturbed cell cycle since biorientation is rapidly established following the bipolar spindle formation [47,90], but may contribute to the maintenance of biorientation when metaphase is extended.

To establish biorientation, any aberrant kinetochore–MT interactions must be weakened and disrupted during error correction, and this process requires phosphorylation of the outer kinetochore components Dam1C and Ndc80C by Aurora B kinase, as discussed in section “Kinetochore–microtubule interactions exchange during error correction”. If the new kinetochore–MT interaction leads to the establishment of chromosome biorientation, tension is applied across sister kinetochores, which stabilizes kinetochore–MT interactions [47,91]. However, it is still not completely understood how Aurora B stops disrupting kinetochore–MT interaction when the tension is applied, i.e. how tension stabilizes kinetochore–MT interaction. To explain this

tension-dependent process, several models have been proposed [69]. In this article, we focus on the following two models, for which new evidence was recently obtained.

The first is the Aurora B spatial separation model [29,92]. The Ndc80C has a long coiled-coil region and, under low tension, can bend at its kink locating in one-third from the Ndc80/Nuf2 CH domains [93,94]. According to the model, Aurora B at the centromere/inner kinetochore can reach Dam1C to phosphorylate its components under low tension (Figure 3A, top). However, when tension is applied, Ndc80C is stretched and exceeds INCENP in length, which would spatially separate Aurora B from its outer kinetochore substrates (Figure 3A, bottom). This would happen in budding yeast because the centromere and inner kinetochore, where CPC localizes, are in close proximity (<10–20 nm), whereas they are farther apart from outer kinetochore substrates of Aurora B (>60 nm) when tension is applied [43,95]. The spatial separation would lead to dephosphorylation of the outer kinetochore substrates [48,96], thus stabilizing the kinetochore–MT interaction [29,92].

The second model is the kinetochore conformational change model [97]. When tension is applied to the kinetochore–MT interaction, the kinetochore–MT interface can undergo a conformational change in such a way that the end-on attachment is stabilized. This may happen if the kinetochore conformational change either (a) results in dephosphorylation of the Aurora B substrates in Dam1C [48] or (b) overcomes the effect of Aurora B-dependent phosphorylation that is weakening the kinetochore attachment to the MT end.

The evidence for the Aurora B spatial separation model was recently obtained in budding yeast, using engineered recruitment of Aurora B–INCENP (Ipl1–Sli15) to the different kinetochore sites [88]. In the absence of physiological Aurora B–INCENP recruitment mechanism to the centromere/inner kinetochore, engineered recruitment of Aurora B–INCENP to the inner kinetochore, but not the outer kinetochore, prior to biorientation supported the subsequent establishment of biorientation [88] (Figure 3B, top). On the other hand, in the

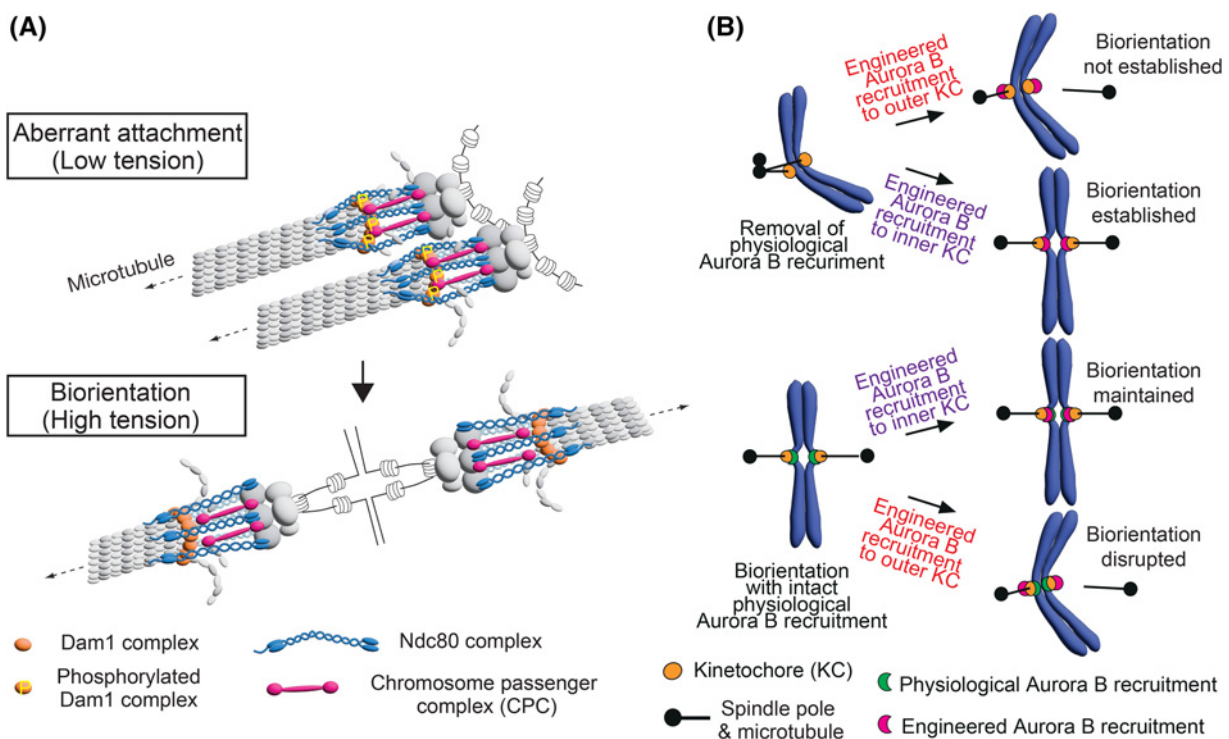

**Figure 3. The Aurora B spatial separation model and the evidence supporting the model.**

(A) The diagram illustrates the Aurora B spatial separation model. It shows the aberrant (syntelic) kinetochore–MT attachment (top) and chromosome biorientation (bottom). To resolve the aberrant kinetochore–MT interaction, the Dam1C components must be phosphorylated by Aurora B kinase. This phosphorylation weakens kinetochore–MT interaction (top), leading to its disruption. When biorientation is established, tension is applied across sister kinetochores, which stretches the Ndc80C. This stretch spatially separates Aurora B from its outer kinetochore substrates, making kinetochore–MT interaction stable. See details in the text. (B) The diagram shows the outcomes of the engineered recruitment of Aurora B (Ipl1), with INCENP (Sli15), to the outer or inner kinetochore, either with or without physiological Aurora B recruitment mechanisms [88]. See details in the text.

presence of physiological Aurora B–INCENP recruitment mechanism, engineered recruitment of Aurora B–INCENP to the outer kinetochore, but not the inner kinetochore, after biorientation establishment subsequently disrupted the biorientation [88] (Figure 3B, bottom). Results similar to the latter were also obtained in human cells [92,98]. These outcomes are explained by the Aurora B spatial separation model, but not by the kinetochore conformational change model alone. Nonetheless, the outcomes can also be explained if both the Aurora B spatial separation and the kinetochore conformational change mechanisms are required for stabilizing the kinetochore–MT interaction under high tension.

Meanwhile, the evidence for the kinetochore conformational change model has recently been obtained with an optical tweezer assay using purified budding yeast kinetochores *in vitro* [99]. In this assay, Aurora B was not detected in the purified kinetochore and, when kinetochore-unbound Aurora B was added to the reaction, the kinetochore–MT interaction was more stable under higher tension [99]. The result supports the kinetochore conformational change model. However, when kinetochore-unbound Aurora B was present at higher concentrations, such an effect was not observed [100]. Thus, for the kinetochore conformational change mechanism to work, the amount of Aurora B reaching its outer kinetochore substrates may need to be lowered when tension is applied. This may be facilitated by the Aurora B spatial separation mechanism. Further investigation is required to uncover molecular details involved in the kinetochore conformational change mechanism. In summary, two different assays recently supported two different mechanisms, i.e. the Aurora B spatial separation mechanism and the kinetochore conformational change mechanism. However, the results of both assays are also consistent with both mechanisms being required for tension-dependent stabilization of chromosome biorientation.

Dam1C phosphorylation by Aurora B is crucial for error correction (see section “Kinetochore–microtubule interactions exchange during error correction”). However, when biorientation is established and tension is applied across sister kinetochores, Dam1C needs to be dephosphorylated to stabilize the end-on attachment [48]. For this process, the action of Aurora B should be attenuated as described above, but phosphatases would also play important roles. In budding yeast, the PP1 phosphatase Glc7 counteracts the Aurora B (Ipl1) kinase activity [101,102]. Glc7 is recruited to the kinetochore by Spc105, Fin1 and Cin8, but none of these mechanisms are essential for biorientation or for cell viability [103–106]. This suggests either (1) Glc7 fractions, which are recruited to the kinetochore by the three proteins, are redundant in dephosphorylating Dam1C, (2) an unknown essential mechanism recruits Glc7 to the kinetochore or (3) Glc7 dephosphorylates Dam1C without localizing at the kinetochore. In addition to PP1, PP2A, which is recruited to the kinetochore by Sgo1, is also implicated in stabilizing the biorientation [107,108]. Moreover, phosphatases also play important roles in the relocation of the CPC from the centromere/kinetochore to the central spindle at the onset of anaphase [70]. When cells enter anaphase, sister chromatid cohesion is removed and tension is reduced at the kinetochore–MT interaction. The CPC removal from the centromere/kinetochore would help maintain robust kinetochore–MT interaction during anaphase. For the CPC relocation, Cdc14 phosphatase plays a major role by reverting Cdk1-dependent phosphorylation of INCENP (Sli15) in budding yeast [109]. More recently, it was also suggested that Fin1–Glc7 promotes the CPC relocation by reverting Aurora B-dependent phosphorylation of INCENP [110] and that Sgo1 sumoylation and PP2A are involved in the CPC relocation at the anaphase onset [111].

## Perspectives

- There have been several advancements in the research of error correction for chromosome biorientation over the last 5 years, using budding yeast as a model organism. We now have a better understanding of the structure of the kinetochore–MT interface, what regulators are involved in error correction, how the exchange of kinetochore–MT interaction is promoted by Aurora B, and how chromosome biorientation is stabilized when tension is applied.
- These advancements rely on the use of advanced technology such as new tools in yeast molecular genetics, advanced light microscopy, cryo-EM, highly sensitive mass spectrometry and *in vitro* reconstitution of kinetochore–MT interactions. The newly discovered mechanisms need to be tested in higher eukaryotes since many of them are expected to be conserved in evolution.

- New questions regarding the error correction mechanisms in budding yeast have also emerged, such as what is the exact process of the exchange of kinetochore–MT interaction during error corrections, how the force is applied in syntelic attachment to disrupt the weakened end-on attachment under low tension, what is the detailed molecular nature stabilizing kinetochore–MT interaction under high tension, and how Mps1, Stu2 and phosphatases regulate error correction.

### Competing Interests

The authors declare that there are no competing interests associated with the manuscript.

### Funding

The work in the authors' laboratory has been supported by the Wellcome Trust [219418/Z/19/Z].

### Open Access

Open access for this article was enabled by the participation of University of Dundee in an all-inclusive *Read & Publish* agreement with Portland Press and the Biochemical Society under a transformative agreement with JISC.

### Author Contributions

S.L. and T.U.T. wrote the manuscript and made figures. T.K. reviewed and edited the manuscript.

### Abbreviations

CH, calponin-homology; CPC, chromosome passenger complex; cryo-EM, cryo-electron microscopy; MTs, microtubules; SAC, spindle-assembly checkpoint; SPBs, spindle pole bodies.

### References

- 1 Biggins, S. (2013) The composition, functions, and regulation of the budding yeast kinetochore. *Genetics* **194**, 817–846 <https://doi.org/10.1534/genetics.112.145276>
- 2 Yan, K., Yang, J., Zhang, Z., McLaughlin, S.H., Chang, L., Fasci, D. et al. (2019) Structure of the inner kinetochore CCAN complex assembled onto a centromeric nucleosome. *Nature* **574**, 278–282 <https://doi.org/10.1038/s41586-019-1609-1>
- 3 Hegemann, J.H. and Fleig, U.N. (1993) The centromere of budding yeast. *Bioessays* **15**, 451–460 <https://doi.org/10.1002/bies.950150704>
- 4 van Hooff, J.J., Tromer, E., van Wijk, L.M., Snel, B. and Kops, G.J. (2017) Evolutionary dynamics of the kinetochore network in eukaryotes as revealed by comparative genomics. *EMBO Rep.* **18**, 1559–1571 <https://doi.org/10.15252/embr.201744102>
- 5 Winey, M. and O'Toole, E.T. (2001) The spindle cycle in budding yeast. *Nat. Cell Biol.* **3**, E23–E27 <https://doi.org/10.1038/35050663>
- 6 Rieder, C.L. and Alexander, S.P. (1990) Kinetochores are transported poleward along a single astral microtubule during chromosome attachment to the spindle in newt lung cells. *J. Cell Biol.* **110**, 81–95 <https://doi.org/10.1083/jcb.110.1.81>
- 7 Tanaka, K., Mukae, N., Dewar, H., van Breugel, M., James, E.K., Prescott, A.R. et al. (2005) Molecular mechanisms of kinetochore capture by spindle microtubules. *Nature* **434**, 987–994 <https://doi.org/10.1038/nature03483>
- 8 Khodjakov, A., Copenagle, L., Gordon, M.B., Compton, D.A. and Kapoor, T.M. (2003) Minus-end capture of preformed kinetochore fibers contributes to spindle morphogenesis. *J. Cell Biol.* **160**, 671–683 <https://doi.org/10.1083/jcb.200208143>
- 9 Maiato, H., Rieder, C.L. and Khodjakov, A. (2004) Kinetochore-driven formation of kinetochore fibers contributes to spindle assembly during animal mitosis. *J. Cell Biol.* **167**, 831–840 <https://doi.org/10.1083/jcb.200407090>
- 10 Kitamura, E., Tanaka, K., Komoto, S., Kitamura, Y., Antony, C. and Tanaka, T.U. (2010) Kinetochores generate microtubules with distal plus ends: their roles and limited lifetime in mitosis. *Dev. Cell* **18**, 248–259 <https://doi.org/10.1016/j.devcel.2009.12.018>
- 11 Vasileva, V., Gierlinski, M., Yue, Z., O'Reilly, N., Kitamura, E. and Tanaka, T.U. (2017) Molecular mechanisms facilitating the initial kinetochore encounter with spindle microtubules. *J. Cell Biol.* **216**, 1609–1622 <https://doi.org/10.1083/jcb.201608122>
- 12 Cheerambathur, D.K., Gassmann, R., Cook, B., Oegema, K. and Desai, A. (2013) Crosstalk between microtubule attachment complexes ensures accurate chromosome segregation. *Science* **342**, 1239–1242 <https://doi.org/10.1126/science.1246232>
- 13 King, J.M., Hays, T.S. and Nicklas, R.B. (2000) Dynein is a transient kinetochore component whose binding is regulated by microtubule attachment, not tension. *J. Cell Biol.* **151**, 739–748 <https://doi.org/10.1083/jcb.151.4.739>
- 14 Shrestha, R.L. and Draviam, V.M. (2013) Lateral to end-on conversion of chromosome-microtubule attachment requires kinesins CENP-E and MCAK. *Curr. Biol.* **23**, 1514–1526 <https://doi.org/10.1016/j.cub.2013.06.040>
- 15 Tanaka, K., Kitamura, E., Kitamura, Y. and Tanaka, T.U. (2007) Molecular mechanisms of microtubule-dependent kinetochore transport toward spindle Poles. *J. Cell Biol.* **178**, 269–281 <https://doi.org/10.1083/jcb.200702141>
- 16 Nicklas, R.B. (1997) How cells get the right chromosomes. *Science* **275**, 632–637 <https://doi.org/10.1126/science.275.5300.632>



- 17 Kalantzaki, M., Kitamura, E., Zhang, T., Mino, A., Novak, B. and Tanaka, T.U. (2015) Kinetochore-microtubule error correction is driven by differentially regulated interaction modes. *Nat. Cell Biol.* **17**, 421–433 <https://doi.org/10.1038/ncb3128>
- 18 Tanaka, T.U. (2010) Kinetochore-microtubule interactions: steps towards bi-orientation. *EMBO J.* **29**, 4070–4082 <https://doi.org/10.1038/emboj.2010.294>
- 19 Lara-Gonzalez, P., Pines, J. and Desai, A. (2021) Spindle assembly checkpoint activation and silencing at kinetochores. *Semin. Cell Dev. Biol.* **117**, 86–98 <https://doi.org/10.1016/j.semcdb.2021.06.009>
- 20 McAinsh, A.D. and Kops, G. (2023) Principles and dynamics of spindle assembly checkpoint signalling. *Nat. Rev. Mol. Cell Biol.* **24**, 543–559 <https://doi.org/10.1038/s41580-023-00593-z>
- 21 Tanaka, T.U. and Desai, A. (2008) Kinetochore-microtubule interactions: the means to the end. *Curr. Opin. Cell Biol.* **20**, 53–63 <https://doi.org/10.1016/j.ccb.2007.11.005>
- 22 Westermann, S., Drubin, D.G. and Barnes, G. (2007) Structures and functions of yeast kinetochore complexes. *Annu. Rev. Biochem.* **76**, 563–591 <https://doi.org/10.1146/annurev.biochem.76.052705.160607>
- 23 Kitamura, E., Tanaka, K., Kitamura, Y. and Tanaka, T.U. (2007) Kinetochore microtubule interaction during S phase in *Saccharomyces cerevisiae* [Research Support, Non-U.S. Gov't]. *Genes Dev.* **21**, 3319–3330 <https://doi.org/10.1101/gad.449407>
- 24 Westermann, S., Avila-Sakar, A., Wang, H.W., Niederstrasser, H., Wong, J., Drubin, D.G. et al. (2005) Formation of a dynamic kinetochore-microtubule interface through assembly of the Dam1 ring complex. *Mol. Cell* **17**, 277–290 <https://doi.org/10.1016/j.molcel.2004.12.019>
- 25 Miranda, J.J., De Wulf, P., Sorger, P.K. and Harrison, S.C. (2005) The yeast DASH complex forms closed rings on microtubules. *Nat. Struct. Mol. Biol.* **12**, 138–143 <https://doi.org/10.1038/nsmb896>
- 26 Westermann, S., Wang, H.W., Avila-Sakar, A., Drubin, D.G., Nogales, E. and Barnes, G. (2006) The Dam1 kinetochore ring complex moves processively on depolymerizing microtubule ends. *Nature* **440**, 565–569 <https://doi.org/10.1038/nature04409>
- 27 Gestaut, D.R., Graczyk, B., Cooper, J., Widlund, P.O., Zelter, A., Wordeman, L. et al. (2008) Phosphoregulation and depolymerization-driven movement of the Dam1 complex do not require ring formation. *Nat. Cell Biol.* **10**, 407–414 <https://doi.org/10.1038/ncb1702>
- 28 Grishchuk, E.L., Efremov, A.K., Volkov, V.A., Spiridonov, I.S., Gudimchuk, N., Westermann, S. et al. (2008) The Dam1 ring binds microtubules strongly enough to be a processive as well as energy-efficient coupler for chromosome motion. *Proc. Natl Acad. Sci. U.S.A.* **105**, 15423–15428 <https://doi.org/10.1073/pnas.0807859105>
- 29 Tanaka, T.U., Rachidi, N., Janke, C., Pereira, G., Galova, M., Schiebel, E. et al. (2002) Evidence that the Ipl1-Sli15 (Aurora kinase-INCENP) complex promotes chromosome bi-orientation by altering kinetochore-spindle pole connections. *Cell* **108**, 317–329 [https://doi.org/10.1016/s0092-8674\(02\)00633-5](https://doi.org/10.1016/s0092-8674(02)00633-5)
- 30 Cheeseman, I.M., Anderson, S., Jwa, M., Green, E.M., Kang, J., Yates, III, J.R. et al. (2002) Phospho-regulation of kinetochore-microtubule attachments by the Aurora kinase Ipl1p. *Cell* **111**, 163–172 [https://doi.org/10.1016/s0092-8674\(02\)00973-x](https://doi.org/10.1016/s0092-8674(02)00973-x)
- 31 Akiyoshi, B., Nelson, C.R., Ranish, J.A. and Biggins, S. (2009) Analysis of Ipl1-mediated phosphorylation of the Ndc80 kinetochore protein in *Saccharomyces cerevisiae*. *Genetics* **183**, 1591–1595 <https://doi.org/10.1534/genetics.109.109041>
- 32 Ng, C.T., Deng, L., Chen, C., Lim, H.H., Shi, J., Surana, U. et al. (2019) Electron cryotomography analysis of Dam1C/DASH at the kinetochore-spindle interface in situ. *J. Cell Biol.* **218**, 455–473 <https://doi.org/10.1083/jcb.201809088>
- 33 Dudziak, A., Engelhard, L., Bourque, C., Klink, B.U., Rombaut, P., Kornakov, N. et al. (2021) Phospho-regulated Bim1/EB1 interactions trigger Dam1C ring assembly at the budding yeast outer kinetochore. *EMBO J.* **40**, e108004 <https://doi.org/10.15252/emj.2021108004>
- 34 Gutierrez, A., Kim, J.O., Umbreit, N.T., Asbury, C.L., Davis, T.N., Miller, M.P. et al. (2020) Cdk1 phosphorylation of the Dam1 complex strengthens kinetochore-microtubule attachments. *Curr. Biol.* **30**, 4491–4499.e5 <https://doi.org/10.1016/j.cub.2020.08.054>
- 35 Dhatchinamoorthy, K., Unruh, J.R., Lange, J.J., Levy, M., Slaughter, B.D. and Gerton, J.L. (2019) The stoichiometry of the outer kinetochore is modulated by microtubule-proximal regulatory factors. *J. Cell Biol.* **218**, 2124–2135 <https://doi.org/10.1083/jcb.201810070>
- 36 Cieslinski, K., Wu, Y.L., Nechyporenko, L., Horner, S.J., Conti, D., Skrzny, M. et al. (2023) Nanoscale structural organization and stoichiometry of the budding yeast kinetochore. *J. Cell Biol.* **222**, e202209094 <https://doi.org/10.1083/jcb.202209094>
- 37 Zelter, A., Bonomi, M., Kim, J.O., Umbreit, N.T., Hoopmann, M.R., Johnson, R. et al. (2015) The molecular architecture of the Dam1 kinetochore complex is defined by cross-linking based structural modelling. *Nat. Commun.* **6**, 8673 <https://doi.org/10.1038/ncomms9673>
- 38 Lampert, F., Hornung, P. and Westermann, S. (2010) The Dam1 complex confers microtubule plus end-tracking activity to the Ndc80 kinetochore complex. *J. Cell Biol.* **189**, 641–649 <https://doi.org/10.1083/jcb.200912021>
- 39 Tien, J.F., Umbreit, N.T., Gestaut, D.R., Franck, A.D., Cooper, J., Wordeman, L. et al. (2010) Cooperation of the Dam1 and Ndc80 kinetochore complexes enhances microtubule coupling and is regulated by aurora B. *J. Cell Biol.* **189**, 713–723 <https://doi.org/10.1083/jcb.200910142>
- 40 Lampert, F., Mieck, C., Alushin, G.M., Nogales, E. and Westermann, S. (2013) Molecular requirements for the formation of a kinetochore-microtubule interface by Dam1 and Ndc80 complexes. *J. Cell Biol.* **200**, 21–30 <https://doi.org/10.1083/jcb.201210091>
- 41 Sarangapani, K.K., Akiyoshi, B., Duggan, N.M., Biggins, S. and Asbury, C.L. (2013) Phosphoregulation promotes release of kinetochores from dynamic microtubules via multiple mechanisms. *Proc. Natl Acad. Sci. U.S.A.* **110**, 7282–7287 <https://doi.org/10.1073/pnas.1220700110>
- 42 Kim, J.O., Zelter, A., Umbreit, N.T., Bollozos, A., Riffle, M., Johnson, R. et al. (2017) The Ndc80 complex bridges two Dam1 complex rings. *Elife* **6**, E21079 <https://doi.org/10.7554/eLife.21069>
- 43 Jenni, S. and Harrison, S.C. (2018) Structure of the DASH/Dam1 complex shows its role at the yeast kinetochore-microtubule interface. *Science* **360**, 552–558 <https://doi.org/10.1126/science.aar6436>
- 44 Flores, R.L., Peterson, Z.E., Zelter, A., Riffle, M., Asbury, C.L. and Davis, T.N. (2022) Three interacting regions of the Ndc80 and Dam1 complexes support microtubule tip-coupling under load. *J. Cell Biol.* **221**, e202107016 <https://doi.org/10.1083/jcb.202107016>
- 45 Muir, K.W., Batters, C., Dendooven, T., Yang, J., Zhang, Z., Burt, A. et al. (2023) Structural mechanism of outer kinetochore Dam1-Ndc80 complex assembly on microtubules. *Science* **382**, 1184–1190 <https://doi.org/10.1126/science.adj8736>
- 46 Zahm, J.A., Jenni, S. and Harrison, S.C. (2023) Structure of the Ndc80 complex and its interactions at the yeast kinetochore-microtubule interface. *Open Biol.* **13**, 220378 <https://doi.org/10.1098/rsob.220378>
- 47 Dewar, H., Tanaka, K., Nasmyth, K. and Tanaka, T.U. (2004) Tension between two kinetochores suffices for their bi-orientation on the mitotic spindle. *Nature* **428**, 93–97 <https://doi.org/10.1038/nature02328>

- 48 Keating, P., Rachidi, N., Tanaka, T.U. and Stark, M.J. (2009) Ipl1-dependent phosphorylation of Dam1 is reduced by tension applied on kinetochores. *J. Cell Sci.* **122**, 4375–4382 <https://doi.org/10.1242/jcs.055566>
- 49 Doodhi, H., Kasciukovic, T., Clayton, L. and Tanaka, T.U. (2021) Aurora B switches relative strength of kinetochore-microtubule attachment modes for error correction. *J. Cell Biol.* **220**, e202011117 <https://doi.org/10.1083/jcb.202011117>
- 50 Maure, J.F., Kitamura, E. and Tanaka, T.U. (2007) Mps1 kinase promotes sister-kinetochore bi-orientation by a tension-dependent mechanism. *Curr. Biol.* **17**, 2175–2182 <https://doi.org/10.1016/j.cub.2007.11.032>
- 51 Jelluma, N., Brenkman, A.B., van den Broek, N.J., Cruijssen, C.W., van Osch, M.H., Lens, S.M. et al. (2008) Mps1 phosphorylates Borealin to control Aurora B activity and chromosome alignment. *Cell* **132**, 233–246 <https://doi.org/10.1016/j.cell.2007.11.046>
- 52 Santaguida, S., Tighe, A., D'Alise, A.M., Taylor, S.S. and Musacchio, A. (2010) Dissecting the role of MPS1 in chromosome biorientation and the spindle checkpoint through the small molecule inhibitor reversine. *J. Cell Biol.* **190**, 73–87 <https://doi.org/10.1083/jcb.201001036>
- 53 Sarangapani, K.K., Koch, L.B., Nelson, C.R., Asbury, C.L. and Biggins, S. (2021) Kinetochore-bound Mps1 regulates kinetochore-microtubule attachments via Ndc80 phosphorylation. *J. Cell Biol.* **220**, e202106130 <https://doi.org/10.1083/jcb.202106130>
- 54 Hayward, D., Roberts, E. and Gruneberg, U. (2022) MPS1 localizes to end-on microtubule-attached kinetochores to promote microtubule release. *Curr. Biol.* **32**, 5200–5208.e8 <https://doi.org/10.1016/j.cub.2022.10.047>
- 55 Winey, M. and Huneycutt, B.J. (2002) Centrosomes and checkpoints: the MPS1 family of kinases. *Oncogene* **21**, 6161–6169 <https://doi.org/10.1038/sj.onc.1205712>
- 56 Araki, Y., Gombos, L., Migueleti, S.P., Sivashanmugam, L., Antony, C. and Schiebel, E. (2010) N-terminal regions of Mps1 kinase determine functional bifurcation. *J. Cell Biol.* **189**, 41–56 <https://doi.org/10.1083/jcb.200910027>
- 57 Benzi, G., Camasses, A., Atsunori, Y., Katou, Y., Shirahige, K. and Piatti, S. (2020) A common molecular mechanism underlies the role of Mps1 in chromosome biorientation and the spindle assembly checkpoint. *EMBO Rep.* **21**, e50257 <https://doi.org/10.15252/embr.202050257>
- 58 Kemmler, S., Stach, M., Knapp, M., Ortiz, J., Pfannstiel, J., Ruppert, T. et al. (2009) Mimicking Ndc80 phosphorylation triggers spindle assembly checkpoint signalling. *EMBO J.* **28**, 1099–1110 <https://doi.org/10.1038/emboj.2009.62>
- 59 Pleuger, R., Cozma, C., Hohoff, S., Denkhau, C., Dudziak, A., Kaschani, F. et al. (2023) Ipl1-controlled attachment maturation regulates Mps1 association with its kinetochore receptor. *bioRxiv* 2023.10.30.564738 <https://doi.org/10.1101/2023.10.30.564738>
- 60 Parnell, E.J., Jenson, E. and Miller, M.P. (2023) An interaction hub on Ndc80 complex facilitates dynamic recruitment of Mps1 to yeast kinetochores to promote accurate chromosome segregation. *bioRxiv* 2023.11.07.566082 <https://doi.org/10.1101/2023.11.07.566082>
- 61 Zahm, J.A. and Harrison, S.C. (2023) A communication hub for phosphoregulation of kinetochore-microtubule attachment. *bioRxiv* 2023.11.22.568383 <https://doi.org/10.1101/2023.11.22.568383>
- 62 Shimogawa, M.M., Graczyk, B., Gardner, M.K., Francis, S.E., White, E.A., Ess, M. et al. (2006) Mps1 phosphorylation of Dam1 couples kinetochores to microtubule plus ends at metaphase. *Curr. Biol.* **16**, 1489–1501 <https://doi.org/10.1016/j.cub.2006.06.063>
- 63 Usui, T., Maekawa, H., Pereira, G. and Schiebel, E. (2003) The XMAP215 homologue Stu2 at yeast spindle pole bodies regulates microtubule dynamics and anchorage. *EMBO J.* **22**, 4779–4793 <https://doi.org/10.1093/emboj/cdg459>
- 64 Al-Bassam, J., van Breugel, M., Harrison, S.C. and Hyman, A. (2006) Stu2p binds tubulin and undergoes an open-to-closed conformational change. *J. Cell Biol.* **172**, 1009–1022 <https://doi.org/10.1083/jcb.200511010>
- 65 Miller, M.P., Asbury, C.L. and Biggins, S. (2016) A TOG protein confers tension sensitivity to kinetochore-microtubule attachments. *Cell* **165**, 1428–1439 <https://doi.org/10.1016/j.cell.2016.04.030>
- 66 Miller, M.P., Evans, R.K., Zelter, A., Geyer, E.A., MacCoss, M.J., Rice, L.M. et al. (2019) Kinetochore-associated Stu2 promotes chromosome biorientation in vivo. *PLoS Genet.* **15**, e1008423 <https://doi.org/10.1371/journal.pgen.1008423>
- 67 Zahm, J.A., Stewart, M.G., Carrier, J.S., Harrison, S.C. and Miller, M.P. (2021) Structural basis of Stu2 recruitment to yeast kinetochores. *Elife* **10**, E65389 <https://doi.org/10.7554/eLife.65389>
- 68 Parmar, S., Gonzalez, S.J., Heckel, J.M., Mukherjee, S., McClellan, M., Clarke, D.J. et al. (2023) Robust microtubule dynamics facilitate low-tension kinetochore detachment in metaphase. *J. Cell Biol.* **222**, e202202085 <https://doi.org/10.1083/jcb.202202085>
- 69 Tanaka, T.U. and Zhang, T. (2022) SWAP, SWITCH, and STABILIZE: mechanisms of kinetochore-microtubule error correction. *Cells* **11**, 1462 <https://doi.org/10.3390/cells11091462>
- 70 Carmena, M., Wheelock, M., Funabiki, H. and Earnshaw, W.C. (2012) The chromosomal passenger complex (CPC): from easy rider to the godfather of mitosis. *Nat. Rev. Mol. Cell Biol.* **13**, 789–803 <https://doi.org/10.1038/nrm3474>
- 71 Buvelot, S., Tatsutani, S.Y., Vermaak, D. and Biggins, S. (2003) The budding yeast Ipl1/Aurora protein kinase regulates mitotic spindle disassembly. *J. Cell Biol.* **160**, 329–339 <https://doi.org/10.1083/jcb.200209018>
- 72 Shimogawa, M.M., Widlund, P.O., Riffle, M., Ess, M. and Davis, T.N. (2009) Bir1 is required for the tension checkpoint. *Mol. Biol. Cell* **20**, 915–923 <https://doi.org/10.1091/mbc.e08-07-0723>
- 73 Kang, J., Cheeseman, I.M., Kallstrom, G., Velmurugan, S., Barnes, G. and Chan, C.S. (2001) Functional cooperation of Dam1, Ipl1, and the inner centromere protein (INCENP)-related protein Sli15 during chromosome segregation. *J. Cell Biol.* **155**, 763–774 <https://doi.org/10.1083/jcb.200105029>
- 74 Kawashima, S.A., Yamagishi, Y., Honda, T., Ishiguro, K. and Watanabe, Y. (2010) Phosphorylation of H2A by Bub1 prevents chromosomal instability through localizing shugoshin. *Science* **327**, 172–177 <https://doi.org/10.1126/science.1180189>
- 75 Tsukahara, T., Tanno, Y. and Watanabe, Y. (2010) Phosphorylation of the CPC by Cdk1 promotes chromosome bi-orientation. *Nature* **467**, 719–723 <https://doi.org/10.1038/nature09390>
- 76 Yamagishi, Y., Honda, T., Tanno, Y. and Watanabe, Y. (2010) Two histone marks establish the inner centromere and chromosome bi-orientation. *Science* **330**, 239–243 <https://doi.org/10.1126/science.1194498>
- 77 Kelly, A.E., Ghenoui, C., Xue, J.Z., Zierhut, C., Kimura, H. and Funabiki, H. (2010) Survivin reads phosphorylated histone H3 threonine 3 to activate the mitotic kinase Aurora B. *Science* **330**, 235–239 <https://doi.org/10.1126/science.1189505>
- 78 Wang, F., Dai, J., Daum, J.R., Niedzialkowska, E., Banerjee, B., Stukenberg, P.T. et al. (2010) Histone H3 Thr-3 phosphorylation by Haspin positions Aurora B at centromeres in mitosis. *Science* **330**, 231–235 <https://doi.org/10.1126/science.1189435>
- 79 Garcia-Rodriguez, L.J., Kasciukovic, T., Denninger, V. and Tanaka, T.U. (2019) Aurora B-INCENP localization at centromeres/inner kinetochores is required for chromosome bi-orientation in budding yeast. *Curr. Biol.* **29**, 1536–1544.e4 <https://doi.org/10.1016/j.cub.2019.03.051>

- 80 Fischbock-Halwachs, J., Singh, S., Potocnjak, M., Hagemann, G., Solis-Mezarino, V., Woike, S. et al. (2019) The COMA complex interacts with Cse4 and positions Sli15/lpl1 at the budding yeast inner kinetochore. *Elife* **8**, e42879 <https://doi.org/10.7554/eLife.42879>
- 81 Marsoner, T., Yedavalli, P., Masnovi, C., Fink, S., Schmitzer, K. and Campbell, C.S. (2022) Aurora B activity is promoted by cooperation between discrete localization sites in budding yeast. *Mol. Biol. Cell* **33**, ar85 <https://doi.org/10.1091/mbc.E21-11-0590>
- 82 Murata-Hori, A. and Wang, Y.L. (2002) Both midzone and astral microtubules are involved in the delivery of cytokinesis signals: insights from the mobility of aurora B. *J. Cell Biol.* **159**, 45–53 <https://doi.org/10.1083/jcb.200207014>
- 83 Beardmore, V.A., Ahonen, L.J., Gorbsky, G.J. and Kallio, M.J. (2004) Survivin dynamics increases at centromeres during G2/M phase transition and is regulated by microtubule-attachment and Aurora B kinase activity. *J. Cell Sci.* **117**, 4033–4042 <https://doi.org/10.1242/jcs.01242>
- 84 Delacour-Larose, M., Molla, A., Skoufias, D.A., Margolis, R.L. and Dimitrov, S. (2004) Distinct dynamics of Aurora B and Survivin during mitosis. *Cell Cycle* **3**, 1418–1426 <https://doi.org/10.4161/cc.3.11.1203>
- 85 Wheatley, S.P., Barrett, R.M., Andrews, P.D., Medema, R.H., Morley, S.J., Swedlow, J.R. et al. (2007) Phosphorylation by aurora-B negatively regulates survivin function during mitosis. *Cell Cycle* **6**, 1220–1230 <https://doi.org/10.4161/cc.6.10.4179>
- 86 Lampson, M.A. and Cheeseman, I.M. (2011) Sensing centromere tension: Aurora B and the regulation of kinetochore function. *Trends Cell Biol.* **21**, 133–140 <https://doi.org/10.1016/j.tcb.2010.10.007>
- 87 Funabiki, H. (2019) Correcting aberrant kinetochore microtubule attachments: a hidden regulation of Aurora B on microtubules. *Curr. Opin. Cell Biol.* **58**, 34–41 <https://doi.org/10.1016/j.cob.2018.12.007>
- 88 Li, S., Garcia-Rodriguez, L.J. and Tanaka, T.U. (2023) Chromosome biorientation requires Aurora B's spatial separation from its outer kinetochore substrates, but not its turnover at kinetochores. *Curr. Biol.* **33**, 4557–4569.e3 <https://doi.org/10.1016/j.cub.2023.09.006>
- 89 Edgerton, H.D., Mukherjee, S., Johansson, M., Bachant, J., Gardner, M.K. and Clarke, D.J. (2023) Low tension recruits the yeast Aurora B protein lpl1 to centromeres in metaphase. *J. Cell Sci.* **136**, jcs261416 <https://doi.org/10.1242/jcs.261416>
- 90 He, X., Athana, S. and Sorger, P.K. (2000) Transient sister chromatid separation and elastic deformation of chromosomes during mitosis in budding yeast. *Cell* **101**, 763–775 [https://doi.org/10.1016/S0092-8674\(00\)80888-0](https://doi.org/10.1016/S0092-8674(00)80888-0)
- 91 Mukherjee, S., Sandri, B.J., Tank, D., McClellan, M., Harasymiw, L.A., Yang, Q. et al. (2019) A gradient in metaphase tension leads to a scaled cellular response in mitosis. *Dev. Cell* **49**, 63–76.e10 <https://doi.org/10.1016/j.devcel.2019.01.018>
- 92 Liu, D., Vader, G., Vromans, M.J., Lampson, M.A. and Lens, S.M. (2009) Sensing chromosome bi-orientation by spatial separation of aurora B kinase from kinetochore substrates. *Science* **323**, 1350–1353 <https://doi.org/10.1126/science.1167000>
- 93 Wang, H.W., Long, S., Ciferri, C., Westermann, S., Drubin, D., Barnes, G. et al. (2008) Architecture and flexibility of the yeast Ndc80 kinetochore complex. *J. Mol. Biol.* **383**, 894–903 <https://doi.org/10.1016/j.jmb.2008.08.077>
- 94 Scarborough, E.A., Davis, T.N. and Asbury, C.L. (2019) Tight bending of the Ndc80 complex provides intrinsic regulation of its binding to microtubules. *Elife* **8**, e44489 <https://doi.org/10.7554/eLife.44489>
- 95 Dimitrova, Y.N., Jenni, S., Valverde, R., Khin, Y. and Harrison, S.C. (2016) Structure of the MIND complex defines a regulatory focus for yeast kinetochore assembly. *Cell* **167**, 1014–1027.e12 <https://doi.org/10.1016/j.cell.2016.10.011>
- 96 Welburn, J.P., Vleugel, M., Liu, D., Yates, III, J.R., Lampson, M.A., Fukagawa, T. et al. (2010) Aurora B phosphorylates spatially distinct targets to differentially regulate the kinetochore-microtubule interface. *Mol. Cell* **38**, 383–392 <https://doi.org/10.1016/j.molcel.2010.02.034>
- 97 Akiyoshi, B., Sarangapani, K.K., Powers, A.F., Nelson, C.R., Reichow, S.L., Arellano-Santoyo, H. et al. (2010) Tension directly stabilizes reconstituted kinetochore-microtubule attachments. *Nature* **468**, 576–579 <https://doi.org/10.1038/nature09594>
- 98 Chen, G.Y., Renda, F., Zhang, H., Gokden, A., Wu, D.Z., Chenoweth, D.M. et al. (2021) Tension promotes kinetochore-microtubule release by Aurora B kinase. *J. Cell Biol.* **220**, e202007030 <https://doi.org/10.1083/jcb.202007030>
- 99 de Regt, A.K., Clark, C.J., Asbury, C.L. and Biggins, S. (2022) Tension can directly suppress Aurora B kinase-triggered release of kinetochore-microtubule attachments. *Nat. Commun.* **13**, 2152 <https://doi.org/10.1038/s41467-022-29542-8>
- 100 de Regt, A.K., Asbury, C.L. and Biggins, S. (2018) Tension on kinetochore substrates is insufficient to prevent Aurora-triggered detachment. *bioRxiv* 2018.09.13.415992v1. <https://www.biorxiv.org/content/10.1101/415992v1>
- 101 Sassoon, I., Severin, F.F., Andrews, P.D., Taba, M.R., Kaplan, K.B., Ashford, A.J. et al. (1999) Regulation of *Saccharomyces cerevisiae* kinetochores by the type 1 phosphatase Glc7p. *Genes Dev.* **13**, 545–555 <https://doi.org/10.1101/gad.13.5.545>
- 102 Pinsky, B.A., Kotwaliwale, C.V., Tatsutani, S.Y., Breed, C.A. and Biggins, S. (2006) Glc7/protein phosphatase 1 regulatory subunits can oppose the lpl1/aurora protein kinase by redistributing Glc7. *Mol. Cell Biol.* **26**, 2648–2660 <https://doi.org/10.1128/MCB.26.7.2648-2660.2006>
- 103 Akiyoshi, B., Nelson, C.R., Ranish, J.A. and Biggins, S. (2009) Quantitative proteomic analysis of purified yeast kinetochores identifies a PP1 regulatory subunit. *Genes Dev.* **23**, 2887–2899 <https://doi.org/10.1101/gad.1865909>
- 104 Rosenberg, J.S., Cross, F.R. and Funabiki, H. (2011) KNL1/Spc105 recruits PP1 to silence the spindle assembly checkpoint. *Curr. Biol.* **21**, 942–947 <https://doi.org/10.1016/j.cub.2011.04.011>
- 105 Suzuki, A., Gupta, A., Long, S.K., Evans, R., Badger, B.L., Salmon, E.D. et al. (2018) A Kinesin-5, Cin8, recruits protein phosphatase 1 to kinetochores and regulates chromosome segregation. *Curr. Biol.* **28**, 2697–2704.e3 <https://doi.org/10.1016/j.cub.2018.08.038>
- 106 Roy, B., Verma, V., Sim, J., Fontan, A. and Joglekar, A.P. (2019) Delineating the contribution of Spc105-bound PP1 to spindle checkpoint silencing and kinetochore microtubule attachment regulation. *J. Cell Biol.* **218**, 3926–3942 <https://doi.org/10.1083/jcb.201810172>
- 107 Eshleman, H.D. and Morgan, D.O. (2014) Sgo1 recruits PP2A to chromosomes to ensure sister chromatid bi-orientation during mitosis. *J. Cell Sci.* **127**, 4974–4983 <https://doi.org/10.1242/jcs.161273>
- 108 Nerusheva, O.O., Galander, S., Fernius, J., Kelly, D. and Marston, A.L. (2014) Tension-dependent removal of pericentromeric shugoshin is an indicator of sister chromosome biorientation. *Genes Dev.* **28**, 1291–1309 <https://doi.org/10.1101/gad.240291.114>
- 109 Pereira, G. and Schiebel, E. (2003) Separase regulates INCENP-Aurora B anaphase spindle function through Cdc14. *Science* **302**, 2120–2124 <https://doi.org/10.1126/science.1091936>
- 110 Sherwin, D., Gutierrez-Morton, E., Bokros, M., Haluska, C. and Wang, Y. (2023) A new layer of regulation of chromosomal passenger complex (CPC) translocation in budding yeast. *Mol. Biol. Cell* **34**, ar97 <https://doi.org/10.1091/mbc.E23-02-0063>
- 111 Su, X.B., Wang, M., Schaffner, C., Nerusheva, O.O., Clift, D., Spanos, C. et al. (2021) SUMOylation stabilizes sister kinetochore biorientation to allow timely anaphase. *J. Cell Biol.* **220**, e202005130 <https://doi.org/10.1083/jcb.202005130>
